# Supplementary material
Source: MDPI journal article supplement (https://www.mdpi.com/2571-6255/6/8/283)
Supplement: s1 [file s1]

## Supplementary annex: Tables and figures.

### ANNEX

Table S1: Preliminary characterization of terrain and vegetation in the research area. Mean values and standard deviations.

| N | Plots/<br>Treatment | Exposition | Slope<br>(%) | Rock/soil<br>type | Initial Main Vegetation (including<br>mosses)                                                                                           |
|---|---------------------|------------|--------------|-------------------|-----------------------------------------------------------------------------------------------------------------------------------------|
| 3 | Control             | Southwest  | 3.1±0.4      | CMe               | <i>Pinus Nigra</i> . J.F.Arnold<br><i>Bromus erectus</i> Hud.<br><i>Genista scorpius</i> (L.) DC.<br><i>Lavandula latifolia</i> Medik.  |
| 3 | Spring<br>PB        | Southwest  | 3.3±0.3      | CMe               | <i>Pinus Nigra</i> . J.F.Arnold<br><i>Bromus erectus</i> Hud.<br><i>Genista scorpius</i> (L.) DC.<br><i>Rosa canina</i> L.              |
| 3 | Autumn<br>PB        | Southwest  | 3.3±0.4      | CMe               | <i>Pinus Nigra</i> . J.F.Arnold<br><i>Bromus erectus</i> Hud.<br><i>Genista scorpius</i> (L.) DC<br><i>Ononis spinosa</i> L.            |
| 3 | Summer<br>PB        | Southwest  | 3.3±0.4      | CMe               | <i>Pinus Nigra</i> . J.F.Arnold<br><i>Bromus erectus</i> Hud.<br><i>Genista scorpius</i> (L.) DC<br><i>Lavandula angustifolia</i> Mill. |

N: Number of plots.

*Table S2: Preliminary characterization (Pre-burned) of physico-chemical soil parameters in the research area. Mean values and standard deviations.*

| Parameters                      | Plots/Seasons |            |            |            |
|---------------------------------|---------------|------------|------------|------------|
|                                 | Control       | Spring PB  | Autumn PB  | Summer PB  |
| Organic Matter Layer depth (cm) | 14 ± 6        | 9.5 ± 3.5  | 15.2 ± 6.8 | 9.9 ± 4.7  |
| pH                              | 7.3 ± 0.4     | 7.6 ± 0.6  | 7.4 ± 0.5  | 7.4 ± 0.4  |
| Nitrogen (%)                    | 0.5 ± 0.0     | 0.4 ± 0.0  | 0.7 ± 0.1  | 0.3 ± 0.0  |
| Organic Carbon (%)              | 11.4 ± 2.1    | 9.7 ± 1.7  | 12.1 ± 2.7 | 10.4 ± 1.9 |
| Inorganic Carbon (%)            | 4.1 ± 1.3     | 3.8 ± 0.4  | 4.5 ± 1.6  | 4.0 ± 0.9  |
| Organic Matter (%)              | 18.0 ± 3.6    | 9.3 ± 1.9  | 19.0 ± 3.9 | 17.2 ± 2.9 |
| Sand (%)                        | 32.6 ± 6.2    | 30.2 ± 5.1 | 33.1 ± 6.5 | 32.1 ± 5.9 |
| Silt (%)                        | 25.3 ± 6.4    | 27.1 ± 6.9 | 24.2 ± 6.1 | 24.8 ± 5.9 |
| Clay (%)                        | 42.1 ± 8.6    | 44.2 ± 8.5 | 43.1 ± 8.3 | 44.1 ± 8.5 |
| Soil texture                    | Clay          | Clay       | Clay       | Clay       |

*PB: prescribed burning.*

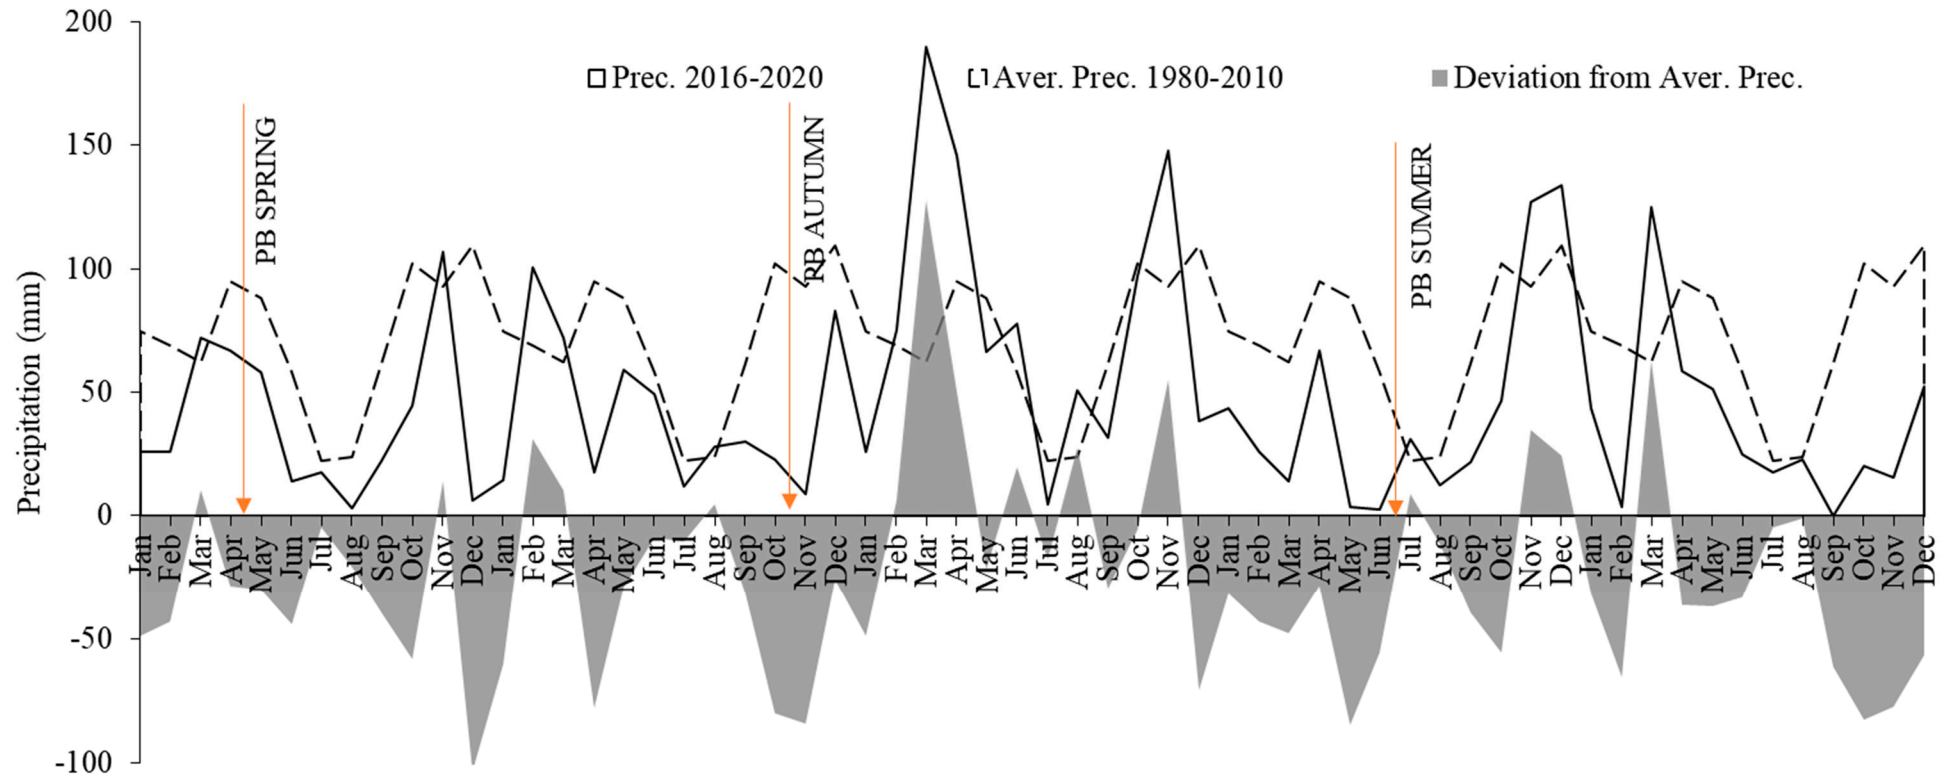

Figure S1: Graph of precipitation (mm) during the study period (2016-2020) compared to the historical average (1980-2010) of the study area, Beteta (Spain). Dashed lines depict the historical average. The continuous line refers to the precipitation for the study period (2016-2020). The gray area denotes the deviation between the historical average and that of the study. 2016 Spring Prescribed Burn = PB SPRING; 2017 Prescribed Burn = PB AUTUMN; 2019 Summer Prescribed Burn = PB SUMMER.
